# Supplementary material for: SERS detection of polycyclic aromatic hydrocarbons using a bare gold nanoparticles coupled film system
Source: Royal Society of Chemistry journal article supplement (doi:10.1039/c6an00319b), 2016-01-01
Supplement: c6an00319b1.pdf [file c6an00319b1.pdf]

## Electronic Supplementary Material (ESI) for Analyst

# SERS Detection of Polycyclic Aromatic Hydrocarbons using a Bare Gold Nanoparticles Coupled Film System

*Hai-Xin Gu, <sup>a,b</sup> Kai Hu, <sup>a</sup> Da-Wei Li <sup>a</sup> and Yi-Tao Long<sup>\*,a</sup>*

<sup>a</sup> Key Laboratory for Advanced Materials and Department of Chemistry, East China  
University of Science and Technology, Shanghai 200237, P. R. China.

<sup>b</sup> Shanghai Fire Research Institute of Ministry of Public Security, Shanghai 200438, P.  
R. China.R. China

\*Corresponding Author, Email: [ytlong@ecust.edu.cn](mailto:ytlong@ecust.edu.cn); Fax/Tel: +86-21-64250032.

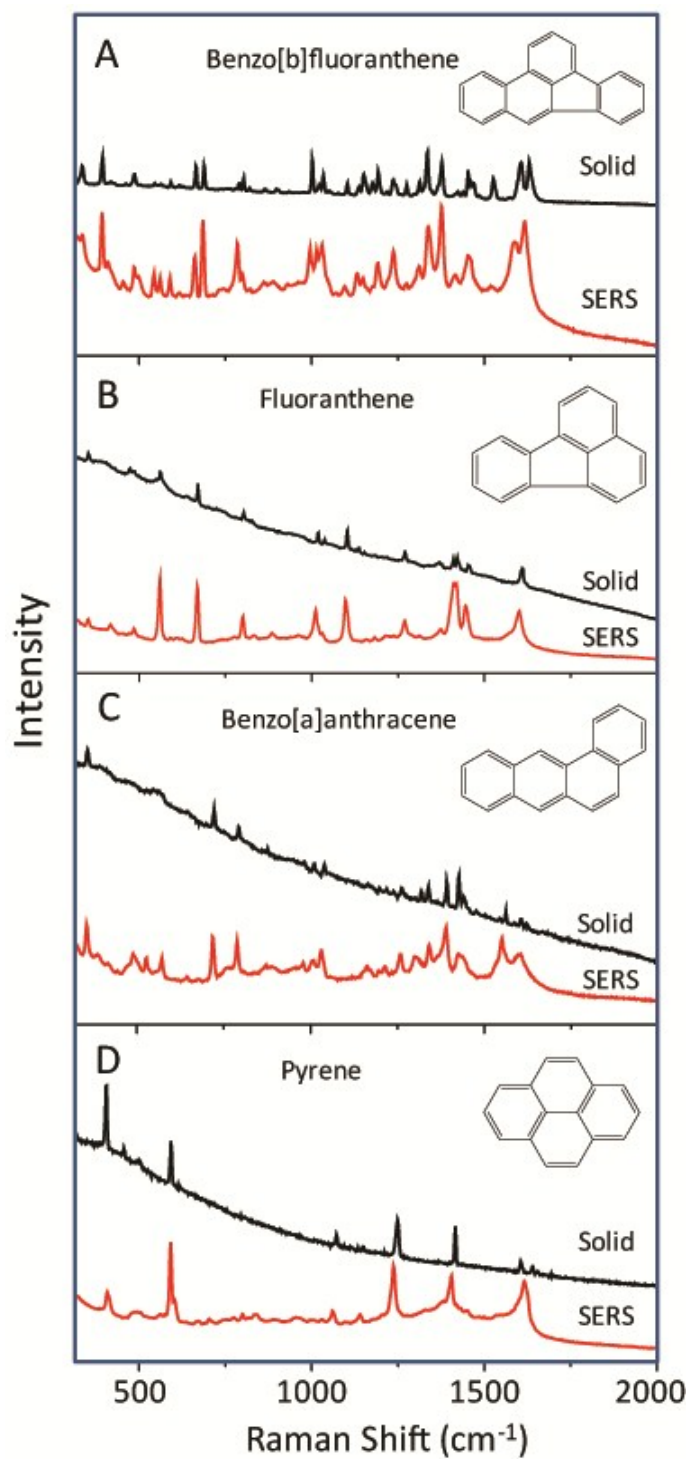

Fig. S1 SERS spectra of 10 $\mu$ M PAHs and their Raman spectra in the solid state: (A) benzo[b]fluoranthene, (B) fluoranthene, (C) benzo[a]anthracene, (D) pyrene. Insert: molecule structures of the four PAHs.
